# Supplementary material
Source: PubMed Central journal article supplement (PMC4249936)
Supplement: NIHMS448784-supplement-Supplemental.pdf [file NIHMS448784-supplement-Supplemental.pdf]

**V-ATPASE V<sub>0</sub> SECTOR SUBUNIT a1 IN NEURONS IS A TARGET OF CALMODULIN\***  
**Wei Zhang<sup>1</sup>, Dong Wang<sup>2</sup>, Elzi Volk<sup>2</sup>, Hugo J. Bellen<sup>3</sup>, P. Robin Hiesinger<sup>2</sup>,  
and Florante A. Quijcho<sup>1</sup>**

From Verna and Marrs McLean Department of Biochemistry and Molecular Biology<sup>1</sup>, Departments of Molecular and Human Genetics and Neuroscience<sup>3</sup> and Howard Hughes Medical Institute<sup>3</sup>, Baylor College of Medicine, Houston, Texas 77030, U.S.A.

Department of Physiology<sup>2</sup> and Green Center Division for Systems Biology<sup>2</sup>, University of Texas Southwestern Medical Center, Dallas, Texas, 75390, U.S.A.

**Running head:** V-ATPase V<sub>0</sub> sector subunit a1 interacts tightly with calmodulin

Address correspondence to: P.R.H. (Email: [robin.hiesinger@utsouthwestern.edu](mailto:robin.hiesinger@utsouthwestern.edu), Phone: 214-645-6060, Fax: 214-645-6049) and F.A.Q. (Email: [faq@bcm.tmc.edu](mailto:faq@bcm.tmc.edu), Phone: 713-798-6565, Fax: 713-798-8516)

**SUPPLEMENTARY DATA**

Supplementary Table 1. Assessment of the effects of mutations of residues in two putative CaM-binding domains in V100-N on binding of Ca<sup>2+</sup>-CaM by pull down and gel filtration assays.

| Location  | Mutation                 | Ca <sup>2+</sup> -CaM binding to V100-N |                    |
|-----------|--------------------------|-----------------------------------------|--------------------|
|           |                          | Pull down                               | Gel filtration     |
| Segment 1 | None, wild-type          | Yes                                     | Yes (see Figure 1) |
|           | F248A                    | Yes                                     | Yes                |
|           | F249A                    | Yes                                     | Yes                |
| Segment 2 | F248A+I261A              | Yes                                     | Yes                |
|           | W318A                    | No                                      | No                 |
|           | F319A                    | No                                      | No (see Figure 1)  |
|           | F319A+I328A <sup>a</sup> | n.d.                                    | n.d.               |
|           | F319A+L332A <sup>a</sup> | n.d.                                    | n.d.               |

<sup>a</sup>Ca<sup>2+</sup>-CaM binding could not be determined (n.d.) or assayed because the double mutations resulted in insoluble V100-N.

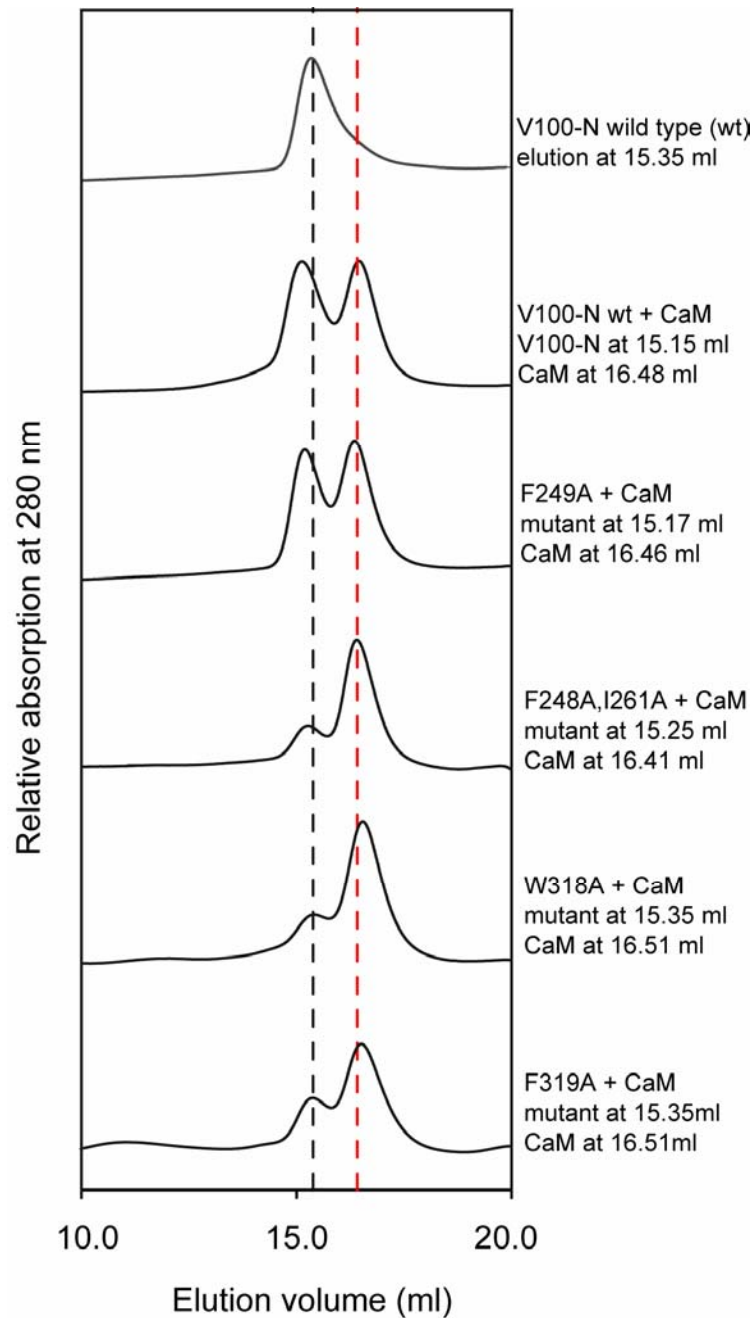

**Supplementary Fig. 1.** Binding of CaM ( $\text{Ca}^{2+}$  loaded) to native V100-N and different mutant forms from replacement of residues on two putative CBD segments (segments 1 and 2; see main paper) assessed by analytical gel filtration. Segment 1 has the sequence 245FIIFFQGDQLKTRVKKICEGFRATLYP271, and segment 2 has the sequence 314NLKNWFVKVRKIKAIYHTLNLFNLD338.

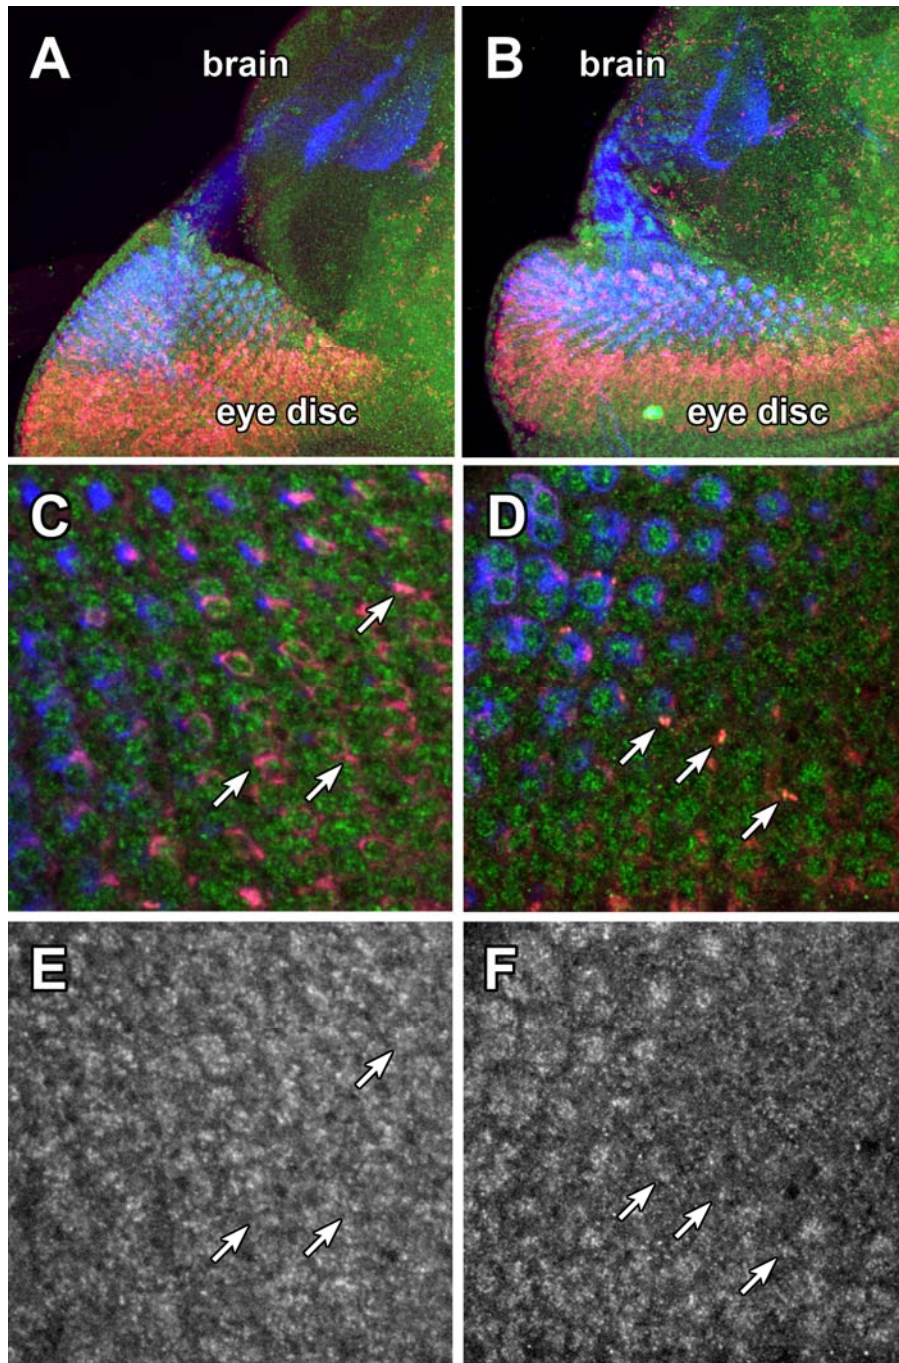

Supplementary Fig. 2. Loss of CaM-binding causes no obvious defects in V100 or CaM localization during photoreceptor development. Shown are larval eye discs and photoreceptor projection in the larval brain. Photoreceptors are rendered mutant using the ey35FLP system and replaced with wild type (*A*, *F*, *E*) or mutant (*B*, *D*, *F*) v100. Blue: Choptin (24B10, a photoreceptor-specific marker), red: anti-V100, green: anti-CaM. V100 as well as CaM are present in cell bodies as well as developing synapses and exhibit an indistinguishable, punctuate and partly overlapping localization pattern.
